# Supplementary material for: Genotypic Characterization of Azotobacteria Isolated from Argentinean Soils and Plant‐Growth‐Promoting Traits of Selected Strains with Prospects for Biofertilizer Production
Source: Hindawi journal article supplement (doi:10.1155/2013/519603), 2013-01-01
Supplement: f1 [file 519603.f1.pdf]

570 **Supplementary material**

571 Complete list of all soil samples analyzed. Geographical origin and coordinates, land use, number of *Azotobacter*-like isolates obtained per soil sample, and soil  
 572 characteristics

| Sample                    | Geographical origin*                | Geographical coordinates        | Sampling site     | Number of isolates | Soil chemical parameters** |      |                           |         |
|---------------------------|-------------------------------------|---------------------------------|-------------------|--------------------|----------------------------|------|---------------------------|---------|
|                           |                                     |                                 |                   |                    | MO (%)                     | pH   | EC (mS cm <sup>-1</sup> ) | P (ppm) |
| <i>Agricultural soils</i> |                                     |                                 |                   |                    |                            |      |                           |         |
| 1                         | Buenos Aires (Azul)                 | S 36° 46' 27.5" W 59° 51' 15.2" | Maize crop        | -                  | 5.12                       | 5.50 | 0.15                      | 14.90   |
| 2                         | Buenos Aires (Azul)                 |                                 | Maize stubble     | 1                  | 3.38                       | 7.30 | 0.48                      | 7.40    |
| 3                         | Buenos Aires (Pergamino)            | S 33° 52' 59.7" W 60° 34' 11.1" | Soybean crop      | -                  | 4.79                       | 5.30 | 0.88                      | 72.10   |
| 4                         | Buenos Aires (Pergamino)            |                                 | Wheat crop        | -                  | 4.02                       | 6.00 | 1.35                      | 48.60   |
| 5                         | Buenos Aires( Tres Arroyos)         | S 38° 22' 34.0" W 60° 16' 43.5" | Sunflower crop    | -                  | 3.47                       | 5.41 | 0.79                      | 34.80   |
| 6                         | Buenos Aires( Necochea)             | S 38° 33' 11.8" W 58° 44' 23.4" | Oat crop          | -                  | 4.36                       | 6.27 | 0.20                      | 30.30   |
| 7                         | Buenos Aires (San Antonio de Areco) | S 34° 14' 53.3" W 59° 27' 58.6" | Wheat crop        | -                  | 3.28                       | 5.45 | 0.80                      | 18.60   |
| 8                         | Buenos Aires (Orense)               | S 38° 41' 9.0" W 59° 46' 21.2"  | Wheat crop        | -                  | 4.90                       | 5.40 | 0.75                      | 17.10   |
| 9                         | Buenos Aires (Balcarce)             | S 37° 50' 44.6" W 58° 15' 21.2" | Agricultural bare | 1                  | 5.72                       | 5.80 | 1.21                      | 51.00   |
| 10                        | Buenos Aires( Tres Arroyos)         |                                 | Wheat crop        | -                  | 3.34                       | 5.20 | 0.22                      | 10.40   |
| 11                        | Buenos Aires (Chivilcoy)            | S 34° 53' 46.3" W 60° 1' 8.5"   | Soybean crop      | -                  | 3.81                       | 5.50 | 0.33                      | 6.70    |
| 12                        | Buenos Aires (Chivilcoy)            |                                 | Soybean crop      | -                  | 2.38                       | 5.50 | 0.26                      | 3.60    |
| 13                        | Buenos Aires (Chivilcoy)            |                                 | Soybean crop      | -                  | 1.10                       | 5.90 | 0.43                      | 2.10    |
| 14                        | Buenos Aires (Chivilcoy)            |                                 | Soybean crop      | -                  | 4.10                       | 5.40 | 0.39                      | 7.30    |
| 15                        | Buenos Aires (Chivilcoy)            |                                 | Soybean crop      | -                  | 3.53                       | 5.50 | 0.26                      | 5.90    |
| 16                        | Buenos Aires (Chivilcoy)            |                                 | Soybean crop      | -                  | 1.26                       | 5.90 | 0.30                      | 1.30    |
| 17                        | Buenos Aires (Ramallo)              | S 33° 31' 24" W 59° 59' 53"     | Sunflower crop    | -                  | 3.31                       | nd   | nd                        | 18.90   |
| 18                        | Buenos Aires (Esteban Echeverría)   | S 34° 52' 23.2" W 58° 28' 29.7" | Agricultural bare | -                  | 2.57                       | 5.69 | 0.53                      | 8.60    |
| 19                        | Buenos Aires (Castelar)             | S 34° 38' 32.7" W 58° 42' 23.3" | Wheat stubble     | -                  | 3.02                       | 5.62 | 0.52                      | 15.80   |
| 20                        | Buenos Aires (Junín)                | S 34° 35' 12.7" W 60° 56' 58.0" | Soybean crop      | -                  | 2.07                       | 6.1  | 0.42                      | 3.40    |
| 21                        | Buenos Aires (Junín)                |                                 | Soybean crop      | -                  | 0.86                       | 7.35 | 0.32                      | 2.10    |
| 22                        | Buenos Aires (Junín)                |                                 | Soybean crop      | -                  | 0.12                       | 8.92 | 0.33                      | 3.10    |
| 23                        | Córdoba (Corral de Bustos)          | S 33° 16' 59.1" W 62° 11' 7.8"  | Wheat crop        | -                  | 3.10                       | 5.81 | 0.68                      | 24.10   |
| 24                        | Córdoba (Corral de Bustos)          |                                 | Wheat crop        | -                  | 2.90                       | 6.00 | 0.55                      | 11.30   |
| 25                        | Córdoba (Corral de Bustos)          |                                 | Wheat crop        | -                  | 3.00                       | 5.93 | 0.63                      | 21.10   |

|    |                                     |                                 |                               |   |      |      |      |        |
|----|-------------------------------------|---------------------------------|-------------------------------|---|------|------|------|--------|
| 26 | Córdoba (Corral de Bustos)          |                                 | Wheat crop                    | - | 2.86 | 6.20 | 0.57 | 7.40   |
| 27 | Córdoba (Corral de Bustos)          |                                 | Wheat crop                    | 1 | 3.12 | 6.13 | 0.69 | 10.10  |
| 28 | Córdoba (Corral de Bustos)          |                                 | Wheat crop                    | 1 | 3.48 | 6.08 | 0.63 | 11.60  |
| 29 | Córdoba (Corral de Bustos)          |                                 | Wheat crop                    | 1 | 3.15 | 6.06 | 0.52 | 11.10  |
| 30 | Córdoba (Huinca Renancó)            | S 34° 50' 24.8" W 64° 22' 19.0" | Soybean crop                  | - | 1.34 | 6.33 | 0.4  | 31.60  |
| 31 | Córdoba (Santa Eufemia)             | S 33° 10' 38" O 63° 17' 20.1"   | Peanut crop                   | - | 2.16 | 5.1  | 1.21 | 41.70  |
| 32 | Córdoba (Santa Eufemia)             |                                 | Wheat crop                    | - | 3.57 | 5.53 | 0.72 | 31.30  |
| 33 | Córdoba (Bell Ville)                | S 32° 37' 11.2" W 62° 41' 21.3" | Soybean crop                  | - | 2.02 | 6.13 | 0.65 | 16.50  |
| 34 | Córdoba (Bell Ville)                |                                 | Soybean crop                  | - | 2.02 | 6.13 | 0.65 | 16.50  |
| 35 | Entre Ríos (Paraná)                 | S 31° 44' 17.1" W 60° 49' 24.1" | Wheat crop                    | 1 | 4.47 | 7.00 | 0.93 | 13.50  |
| 36 | Santa Fe (Videla)                   | S 30° 56' 0.4" O 60° 39' 2.9"   | Soybean crop                  | 1 | 2.10 | 7.43 | 0.54 | 7.00   |
| 37 | Santa Fe (Videla)                   |                                 | Soybean crop                  | - | 1.59 | 8.07 | 1.04 | 3.10   |
| 38 | Santa Fe (Videla)                   |                                 | Soybean crop                  | 1 | 1.00 | 8.28 | 0.94 | 3.00   |
| 39 | Santa Fe (Videla)                   |                                 | Soybean crop                  | - | 2.45 | 6.53 | 0.75 | 18.00  |
| 40 | Santa Fe (Videla)                   |                                 | Soybean crop                  | - | 1.79 | 6.38 | 0.28 | 6.40   |
| 41 | Santa Fe (Videla)                   |                                 | Soybean crop                  |   | 1.12 | 6.71 | 0.46 | 5.30   |
| 42 | Santa Fe (Runciman)                 | S 33° 53' 39.7" W 61° 49' 24.1" | Soybean crop                  | - | 3.43 | 5.00 | 1.26 | 33.50  |
| 43 | Santa Fe (Runciman)                 |                                 | Soybean crop                  | - | 4.64 | 5.00 | 1.45 | 67.00  |
| 44 | Santa Fe (Amstrong)                 | S 32° 46' 52.5" W 61° 36' 8.8"  | Soybean crop                  | - | 3.36 | 6.00 | 0.71 | 101.40 |
| 45 | Santa Fe (Amstrong)                 |                                 | Soybean crop                  | - | 3.41 | 6.00 | 0.67 | 76.10  |
| 46 | Santa Fe (Amstrong)                 |                                 | Soybean crop                  | - | 3.45 | 6.10 | 0.39 | 40.20  |
| 47 | Santa Fe (Oliveros)                 | S 32° 34' 27.4" W 60° 50' 59.8" | Soybean crop                  | - | 1.88 | 5.63 | 0.51 | 12.10  |
| 48 | Santa Fe (Venado Tuerto)            | S 33 44 58.1 W 61 57 55.3       | Soybean crop                  | - | 3.74 | 6.07 | 0.44 | 35.80  |
| 49 | Santiago del Estero (Quimilí)       | S 27° 38' 37.6" W 62° 24' 56.2" | Soybean crop                  | - | 2.84 | 7.03 | nd   | 125.70 |
| 50 | Santiago del Estero (Quimilí)       |                                 | Soybean crop                  | 3 | 3.10 | 7.17 | nd   | 127.80 |
| 51 | Santiago del Estero (Quimilí)       |                                 | Soybean crop                  | 2 | 2.78 | 7.16 | nd   | 104.20 |
| 52 | Salta (Embarcación)                 | S 23° 12' 32.1" W 64° 5' 50.1"  | Soybean crop                  | 1 | 1.78 | 6.40 | 0.21 | 48.80  |
|    |                                     |                                 | <i>Non-agricultural soils</i> |   |      |      |      |        |
| 53 | Buenos Aires (Arrecifes)            | S 34° 2' 48.1" W 60° 6' 13.5"   | Clover pasture                | - | 4.36 | 4.70 | 0.53 | 29.70  |
| 54 | Buenos Aires (Santa Clara del Mar ) | S 37° 46' 45.8" W 57° 30' 54.5" | Side of road                  | 1 | 5.72 | 7.83 | 0.80 | 8.50   |
| 55 | Buenos Aires (Santa Clara del Mar ) |                                 | Urban land                    | 2 | 0.98 | 8.45 | 0.48 | 8.50   |
| 56 | Buenos Aires (Vedia)                | S 34° 39' 53.4" W 61° 32' 56.2" | Clover pasture                | - | 2.95 | 5.50 | 0.29 | 15.00  |
| 57 | Buenos Aires (Mar Chiquita)         | S 37° 44' 31.0" W 57° 25' 49.6" | Lagoon bank 1                 | 1 | 1.86 | 8.20 | 0.43 | 1.90   |

|    |                              |                                 |                   |   |      |      |      |        |
|----|------------------------------|---------------------------------|-------------------|---|------|------|------|--------|
| 58 | Buenos Aires (Mar Chiquita)  |                                 | Lagoon bank 2     | 1 | 1.05 | 8.00 | 1.45 | 7.70   |
| 59 | Buenos Aires (Bordenave)     | S 37° 48' 12.8" W 63° 2' 28.3"  | Fescue pasture    | - | 3.38 | 6.99 | 0.17 | 11.10  |
| 60 | Buenos Aires (Bordenave)     |                                 | Agropyron pasture | - | 6.79 | 6.40 | 0.24 | 11.40  |
| 61 | Buenos Aires (Necochea)      |                                 | Side of road      | - | 7.07 | 6.05 | 0.22 | 146.40 |
| 62 | Santa Fe (Runciman)          |                                 | Natural pasture   | - | 4.55 | nd   | nd   | 72.20  |
| 63 | Santa Fe (Runciman)          |                                 | Natural pasture   | - | 4.24 | nd   | nd   | 79.40  |
| 64 | Chubut (Puerto Madryn)       | S 42° 45' 4.7" W 65° 2' 55.4"   | Natural pasture   | 1 | 1.09 | 7.50 | 0.48 | 7.40   |
| 65 | Chubut (Gaiman)              | S 43° 17' 20.0" W 65° 29' 31.8" | Natural pasture   | 1 | 3.15 | 8.30 | 0.66 | 45.80  |
| 66 | Chubut (Villa Ameghino)      | S 43° 47' 57.7" W 65° 44' 57"   | River bank        | 1 | 2.81 | 7.70 | 1.50 | 43.50  |
| 67 | Chubut (Trevelín)            | S 43° 4' 44.7" W 71° 27' 51.7"  | River bank        | 1 | 1.02 | 6.60 | 1.58 | 8.10   |
| 68 | Chubut (Esquel)              | S 42° 55' 1.5" W 71° 19' 20.7"  | Natural pasture   | 1 | 2.74 | 6.40 | 0.49 | 40.40  |
| 69 | Neuquén (Villa La Angostura) | S 40° 45' 47.8" W 71° 38' 46.1" | Creek edge        | - | 1.79 | 6.20 | 1.51 | 17.50  |
| 70 | Río Negro (Gutiérrez)        | S 38° 56' 9.9" W 67° 58' 19.2"  | Creek edge        | - | 8.03 | 6.20 | nd   | 45.50  |
| 71 | Río Negro (Gutiérrez)        |                                 | Natural pasture   | - | 2.74 | 5.40 | 1.48 | 1.00   |
| 72 | Salta (J.V. González)        | S 25° 6' 53.9" W 64° 7' 48.2"   | Natural pasture   | 1 | 1.64 | 7.80 | 2.24 | 3.00   |
| 73 | Jujuy (Tilcara)              | S 24° 11' 58.5" W 65° 17' 55.1" | Side of road      | 4 | 0.19 | 8.77 | 0.28 | 4.80   |
| 74 | Jujuy (Tilcara)              |                                 | Natural pasture   | 2 | 0.17 | 8.60 | 0.20 | 4.50   |

573

574 Buenos Aires, Córdoba, Entre Ríos and Santa Fe are provinces from Pampas region, Jujuy, Salta and Santiago del Estero are provinces from Northwest region, and  
575 Chubut, Neuquén and Río Negro are provinces from Patagonia region of Argentina.

576 \*\* OM: organic matter; EC: electrical conductivity; P: extractable phosphorus; nd: not determined
